# Supplementary material
Source: PubMed Central journal article supplement (PMC2701974)
Supplement: NIHMS111998-supplement-2.pdf [file NIHMS111998-supplement-2.pdf]

# Twin-Spot MARCM to reveal developmental origin and identity of neurons

Hung-Hsiang Yu, Chun-Hong Chen, Lei Shi, Yaling Huang, and Tzumin Lee

## SUPPLEMENTARY INFORMATION

### Efficacy and specificity of RNAi suppression of two reporters

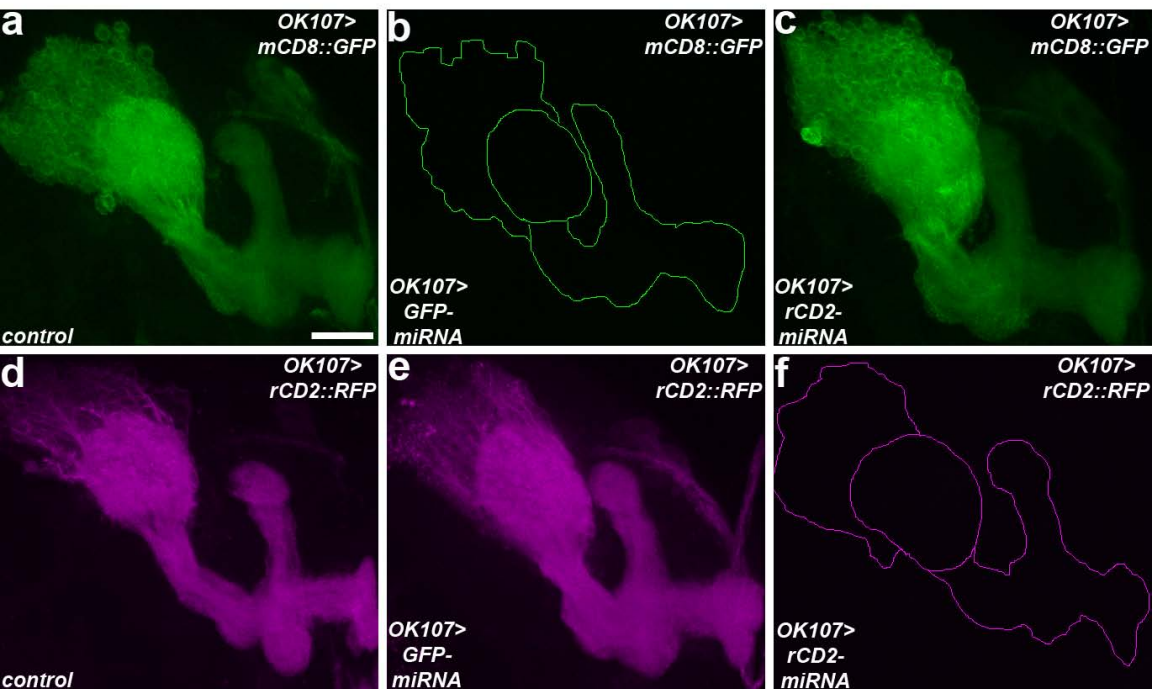

**Supplemental Figure 1.** *GFP-miRNA* (b) but not *rCD2-miRNA* (c) is a potent suppressor of *mCD8::GFP* driven by *GAL4-OK107*. In contrast, *rCD2-miRNA* (f) but not *GFP-miRNA* (e) effectively blocks the expression of *rCD2::RFP* driven by *GAL4-OK107*. Outline of MB is depicted in [b] and [f]. The scale bar is 20  $\mu\text{m}$ .

# Stereotyped neurite projections of central complex neurons

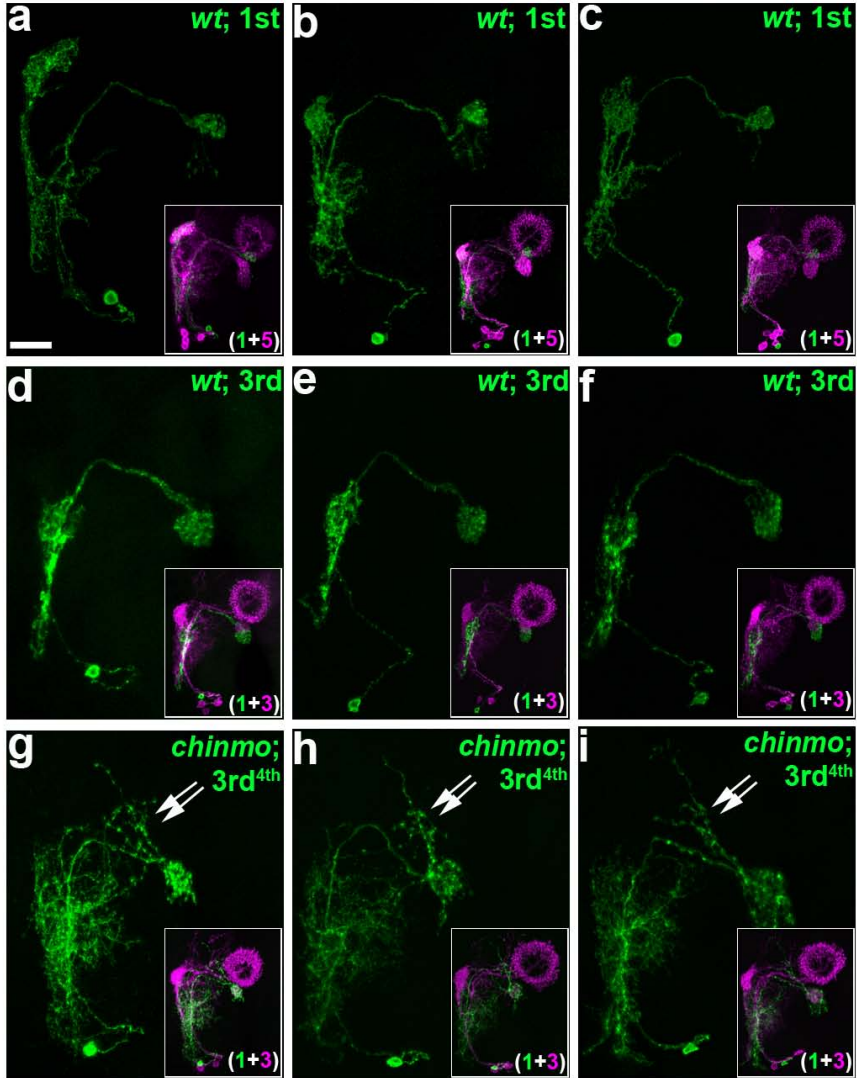

**Supplemental Figure 2.** (a-i) By counting the cell number of multi-cellular Nb clones (insets), the birth order of their associated single-cell clones is determined. Stereotyped morphology of the first-born (a-c) and third-born (d-f) noduli neurons are observed in the *GAL4-OK107*-positive central complex sublineage. The third-born *chinmo* neuron exhibits the morphology of the fourth-born wild-type neuron (3rd<sup>4th</sup>; g-i). Stereotyped ectopic projections (double arrows) are observed in these 3rd<sup>4th</sup> *chinmo* neurons (g-i, compared to Fig. 4g). The scale bar is 20  $\mu$ m.
